# Supplementary material for: Nomograms for predicting overall survival and cancer-specific survival in young patients with pancreatic cancer in the US based on the SEER database
Source: PeerJ journal article supplement (doi:10.7717/peerj.8958), 2020-04-14

Step of click SPSS (version 26)

1.file → open → data

Analyze → Tables → Custom Tables（Chi-square test was used to compare the clinicopathological characteristics between the training set and the validation set）


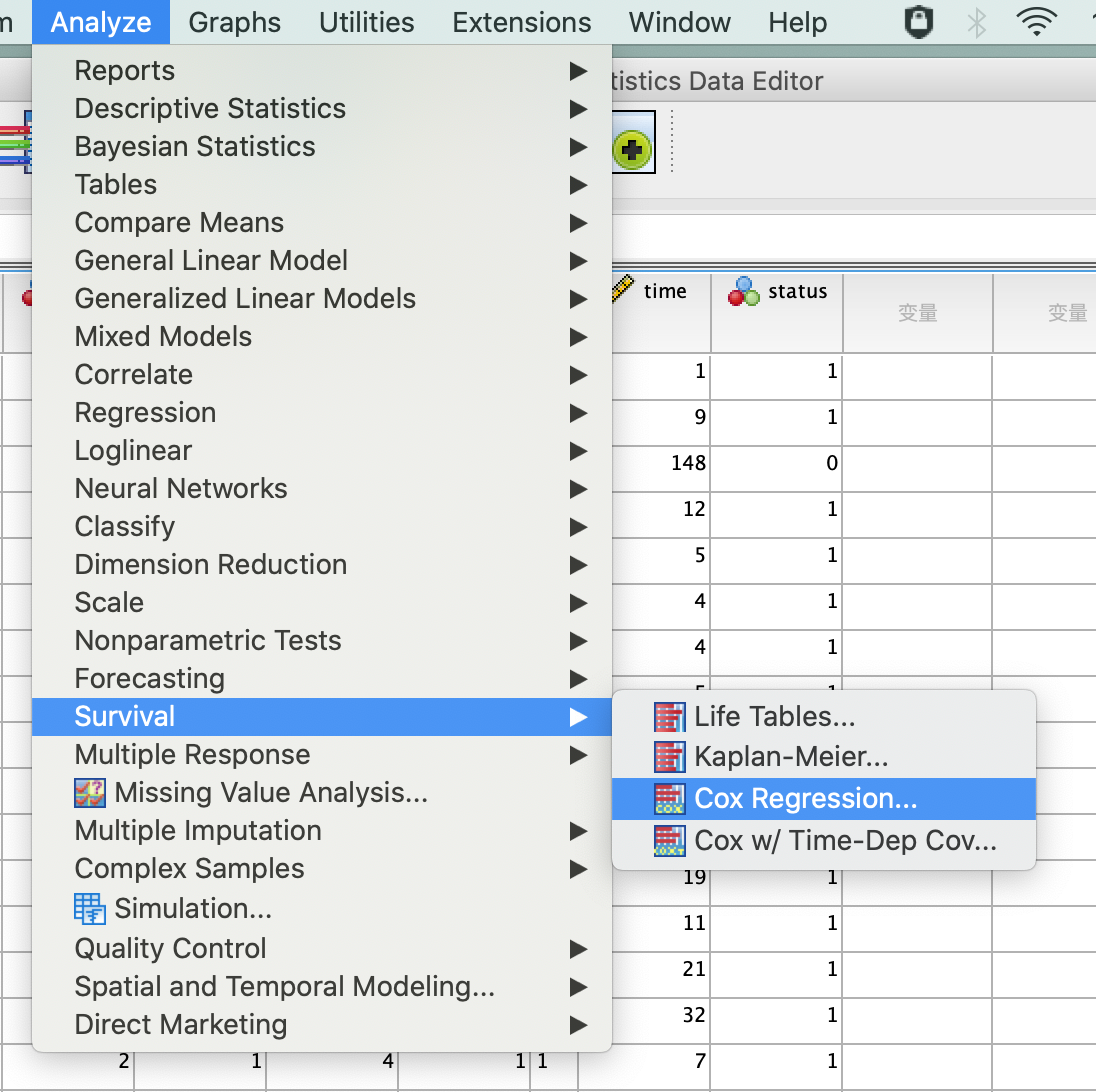

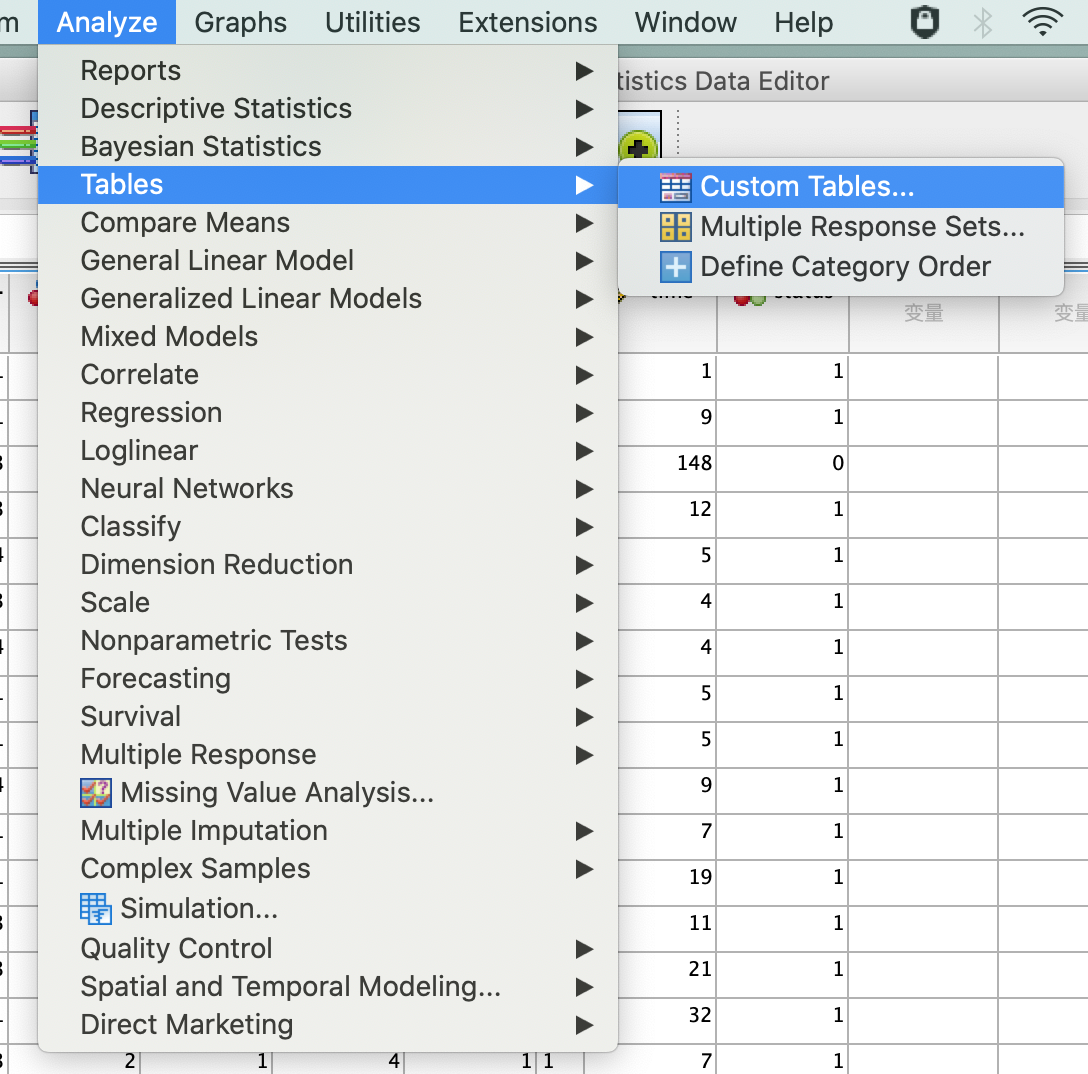


2. file → open → data

Analyze → survival → Cox regression (Univariate and forward stepwise multivariate Cox analysis was used to determine the independent factors affecting OS

)


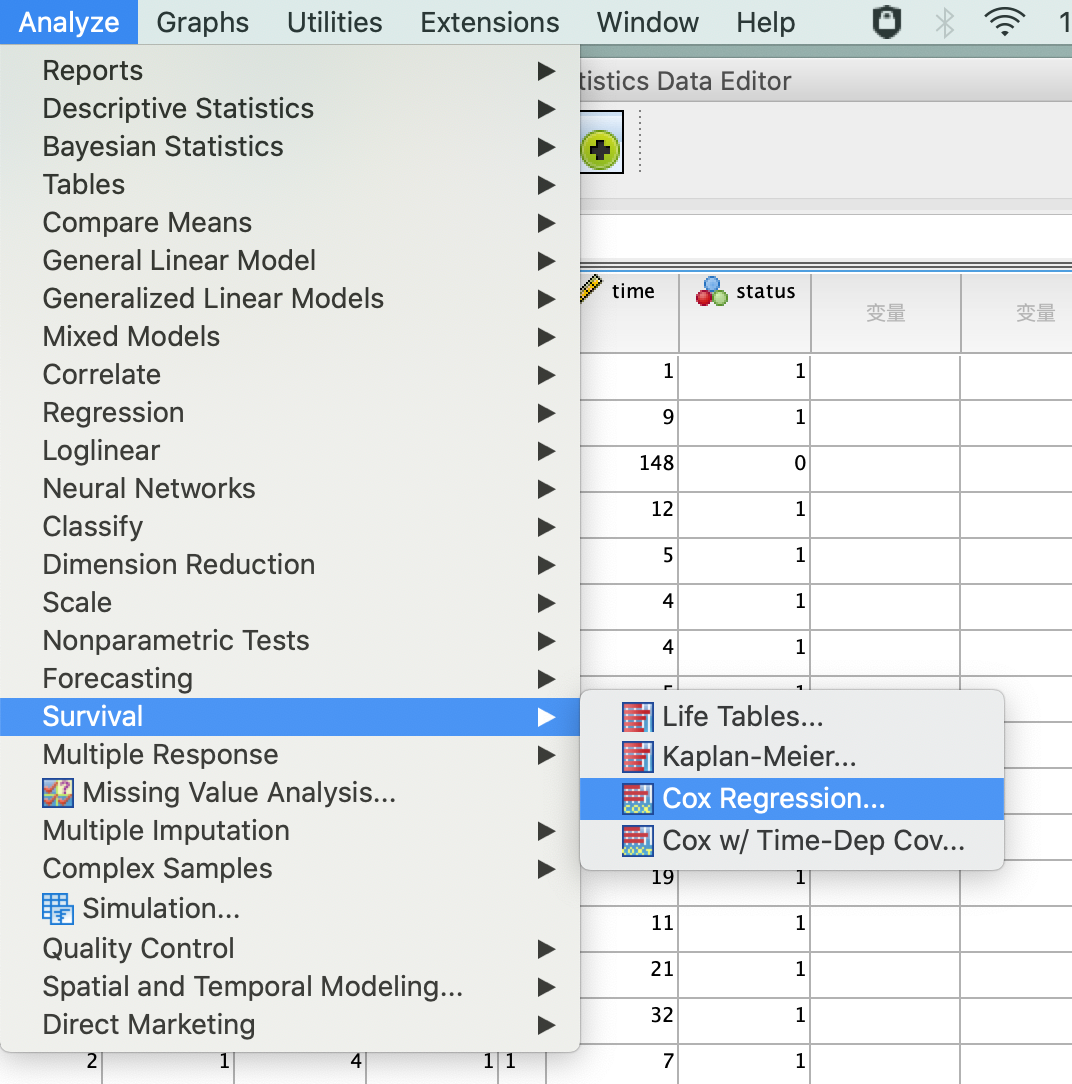

Supplement: file3.docx [file file3.docx]
