# Supplementary material for: Nomograms for predicting overall survival and cancer-specific survival in young patients with pancreatic cancer in the US based on the SEER database
Source: PeerJ journal article supplement (doi:10.7717/peerj.8958), 2020-04-14
Supplement: Table_S1.docx [file Table_S1.docx]

Table S1. The score of each variable in the OS and CSS nomogram

| Variables |  | OS | CSS |
| --- | --- | --- | --- |
| Gender |  |  | NA |
|  | Male | 7 |  |
|  | Female | 0 |  |
| Grade |  |  | NA |
|  | High differentiated | 0 |  |
|  | Low differentiated | 31 |  |
|  | Unknown | 11 |  |
| Race |  |  | NA |
|  | White | 9 |  |
|  | Black | 14 |  |
|  | Others | 0 |  |
| Primary site |  | NA |  |
|  | Head |  | 13 |
|  | Body |  | 7 |
|  | Tail |  | 11 |
|  | Others |  | 0 |
| Pathological types |  |  |  |
|  | Ductal adenocarcinoma | 60 | 70 |
|  | Non-ductal adenocarcinoma | 0 | 0 |
| Surgery |  |  |  |
|  | No | 54 | 44 |
|  | Yes | 0 | 0 |
| AJCC |  |  |  |
|  | I | 0 | 0 |
|  | II | 71 | 76 |
|  | III | 73 | 81 |
|  | IV | 100 | 100 |
